# Supplementary material for: A Molecular Clock Regulates Angiopoietin-Like Protein 2 Expression
Source: PubMed Central journal article supplement (PMC3585275; doi:10.1371/journal.pone.0057921), 2013-02-28
Supplement: pone.0057921.s005.pdf [file pone.0057921.s005.pdf]

**Table S2. Primer pairs and templates used to generate human *ANGPTL2* reporters and mutant F3 reporters**

| Construct        | Primer pair                                                                                                           | Template    |
|------------------|-----------------------------------------------------------------------------------------------------------------------|-------------|
| F1 (-3118 ~ +98) | F1-FW: 5'-GGCGCGGTACCTACATGAAGAATCTTTG-3'<br>ANGPTL2-RV: 5'-TACGGATCTCGAGCCGCCAGAGGAA-3'                              | BAC clone   |
| F2 (-1618 ~ +98) | F2-FW: 5'-GTATTGGTACCTTGCTCACGTGTCTGCG-3'<br>ANGPTL2-RV                                                               | BAC clone   |
| F3 (-618 ~ +98)  | F3-FW: 5'-GCAATGGTACCGATGCATGGAAGGGATG-3'<br>ANGPTL2-RV                                                               | BAC clone   |
| F4 (-168 ~ +98)  | F4-FW: 5'-TAATATTGGTACCAGGGCGGGCCAGGGAGC-3'<br>ANGPTL2-RV                                                             | BAC clone   |
| F5 (-21 ~ +98)   | F5-FW: 5'-TATATTAGGTACCGGGCTGAGGGGAGGCC-3'<br>ANGPTL2-RV                                                              | BAC clone   |
| F3-mE1           | F3-FW<br>ANGPTL2-RV<br>F3-mE1FW: 5'-GCCACTAACGAATGAAGTCACAGAGC-3'<br>F3-mE1RV: 5'-GCTCTGTGACTTCATTCGTTAGTGGC-3'       | pGL3-F3     |
| F3-mE2           | F3-FW<br>ANGPTL2-RV<br>F3-mE2FW: 5'-TGCTCGAACGAAGCTGCACGCACA-3'<br>F3-mE2RV: 5'-TGTGCGTGCAGCTTCGTTTCGAGCA-3'          | pGL3-F3     |
| F3-mE3           | F3-FW<br>ANGPTL2-RV<br>F3-mE3FW: 5'-GCACGCAAAGCAAGAGCGGATCTAAA-3'<br>F3-mE3RV: 5'-TTAGATCCGCTCTTGCTTTGCGTGC-3'        | pGL3-F3     |
| F3-mE4           | F3-FW<br>ANGPTL2-RV<br>F3-mE4FW: 5'-TCGCAGAACGAAGGAGCTGCCTGAGCTTT-3'<br>F3-mE4RV: 5'-AAAGCTCAGGCAGCTCCTTCGTTCTGCGA-3' | pGL3-F3     |
| F3-mE1/2         | F3-FW, ANGPTL2-RV, F3-mE2FW, F3-mE2RV                                                                                 | pGL3-F3-mE1 |
| F3-mE1/3         | F3-FW, ANGPTL2-RV, F3-mE3FW, F3-mE3RV                                                                                 | pGL3-F3-mE1 |
| F3-mE1/4         | F3-FW, ANGPTL2-RV, F3-mE4FW, F3-mE4RV                                                                                 | pGL3-F3-mE1 |
| F3-mE2/3         | F3-FW, ANGPTL2-RV, F3-mE3FW, F3-mE3RV                                                                                 | pGL3-F3-mE2 |
| F3-mE2/4         | F3-FW, ANGPTL2-RV, F3-mE4FW, F3-mE4RV                                                                                 | pGL3-F3-mE2 |
| F3-mE3/4         | F3-FW, ANGPTL2-RV, F3-mE4FW, F3-mE4RV                                                                                 | pGL3-F3-mE3 |
